# Supplementary material
Source: PubMed Central journal article supplement (PMC3463631)
Supplement: mmc1.pdf [file mmc1.pdf]

Suppl. Figure 1

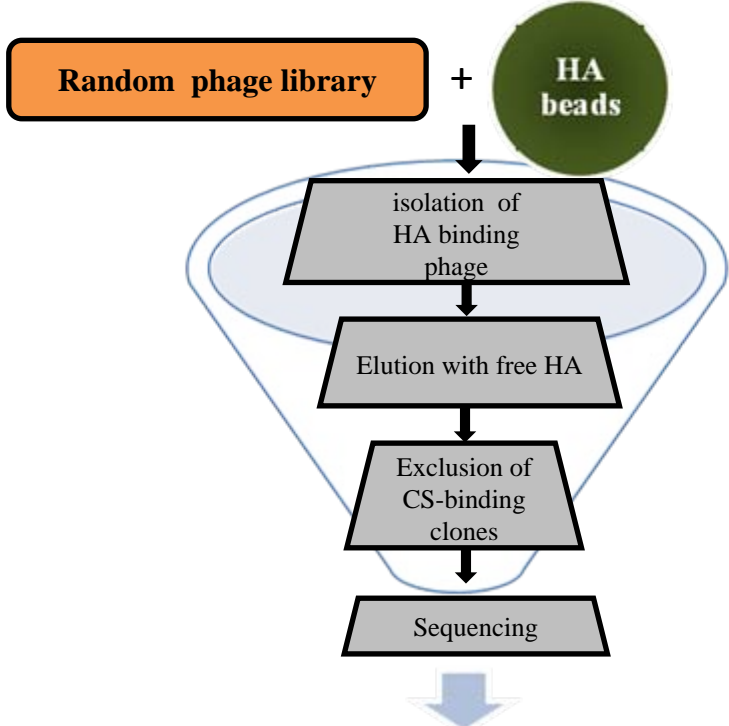

| Library | # unique sequences | Sequence frequency |
|---------|--------------------|--------------------|
| 15-mer  | 2                  | 28-72 %            |
| 12-mer  | 14                 | 1-10 %             |
| 7-mer   | 15                 | 4-18 %             |

Mouse RHAMM L **K** Q **K I K H V V K L K** D E N S Q L **K** S E V S **K L R S Q L V K R K**  
 P15-1 S T M M S R S H K T R S H H V  
 P15-2 T M T R P H F H K R Q L V L S
