# Supplementary material
Source: PubMed Central journal article supplement (PMC3463631)

Suppl. Figure 2

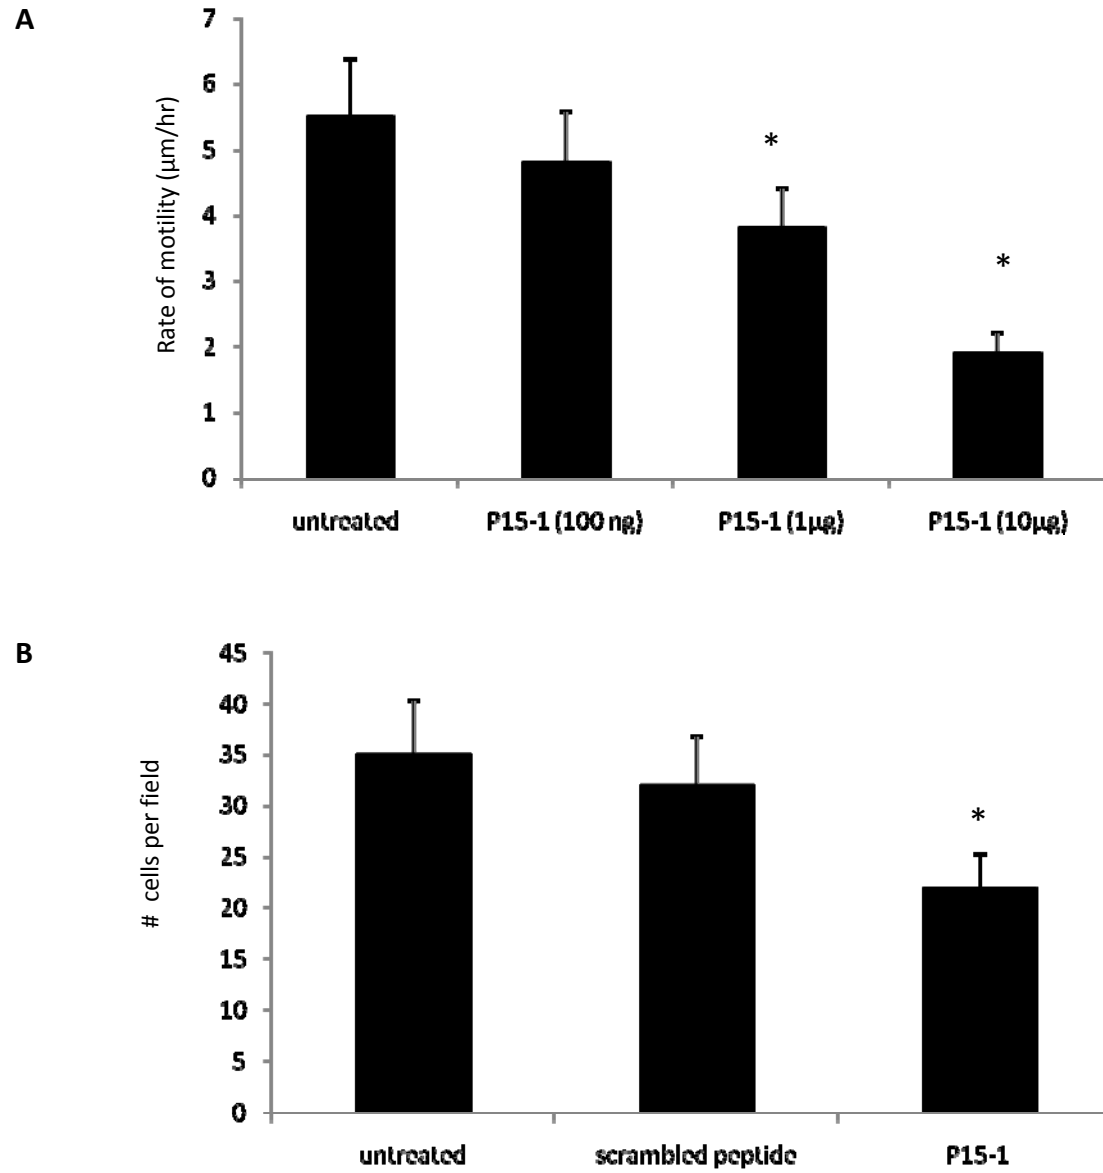

Supplement: mmc2.pdf [file mmc2.pdf]

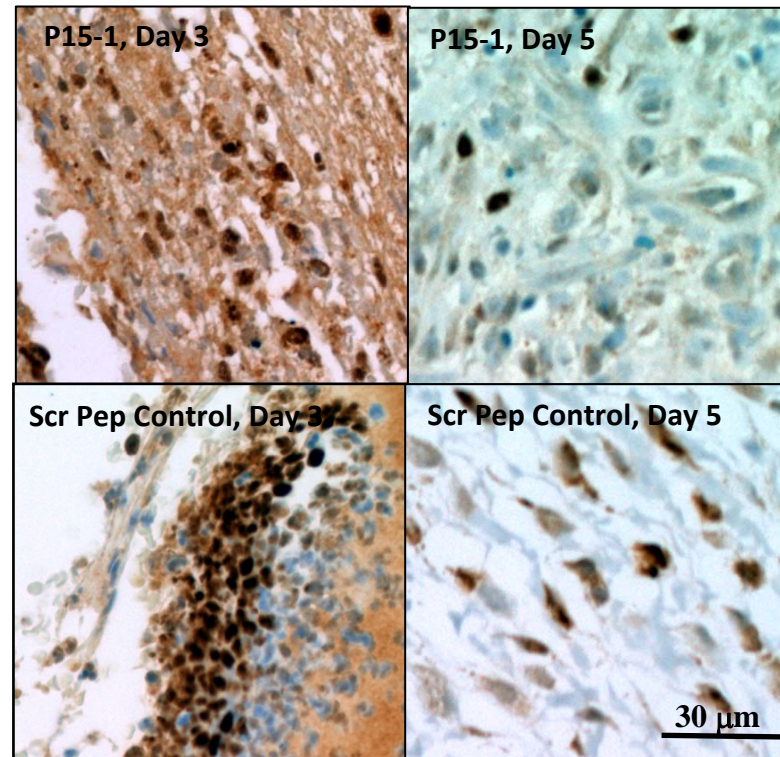

Supplement: mmc3.pdf [file mmc3.pdf]

Suppl. Figure 4

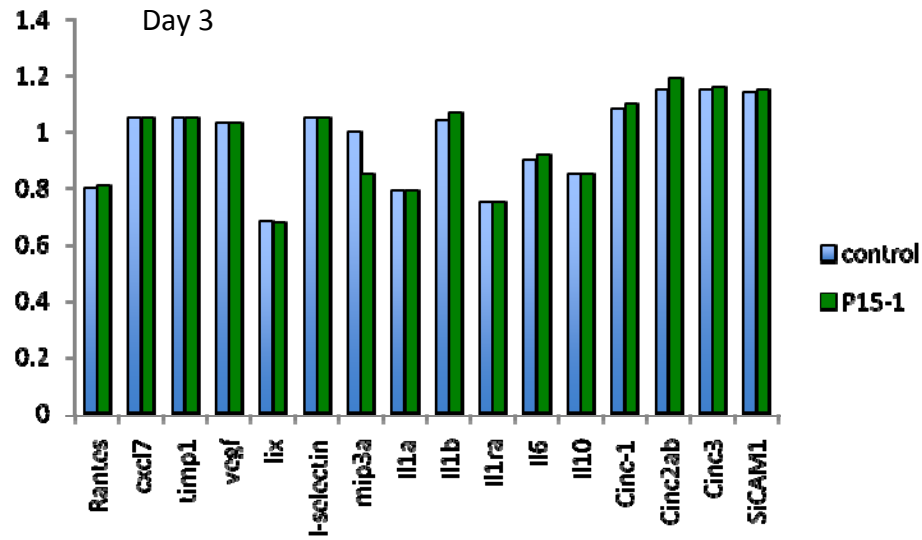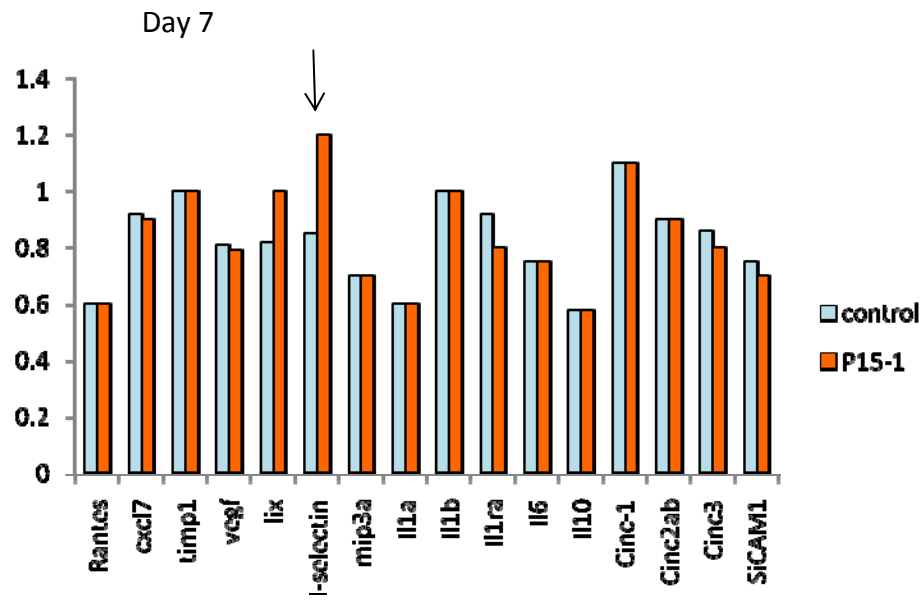

Supplement: mmc4.pdf [file mmc4.pdf]

Suppl Figure 5

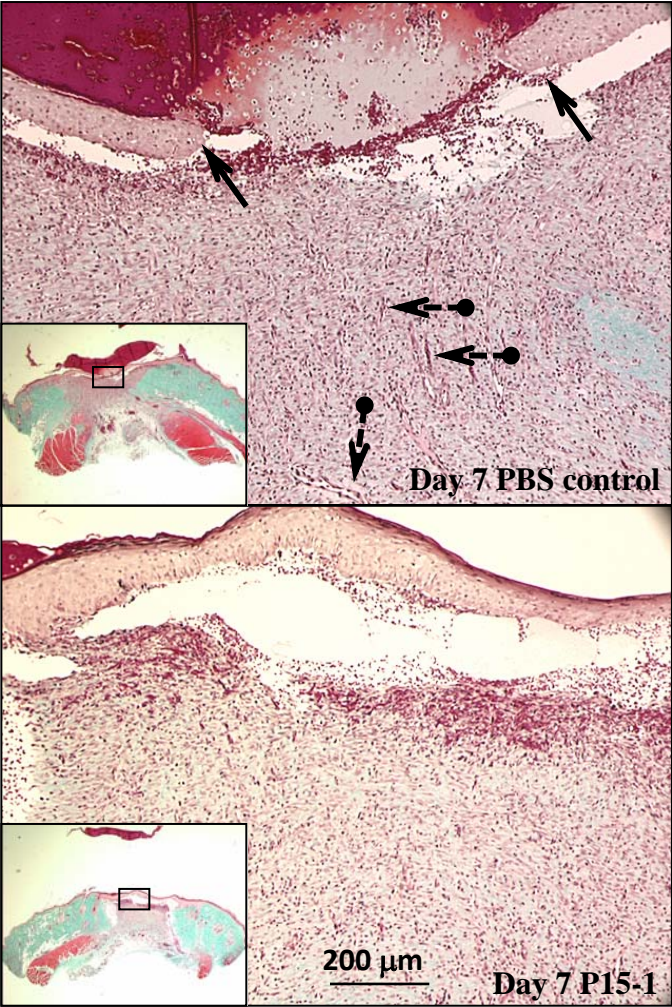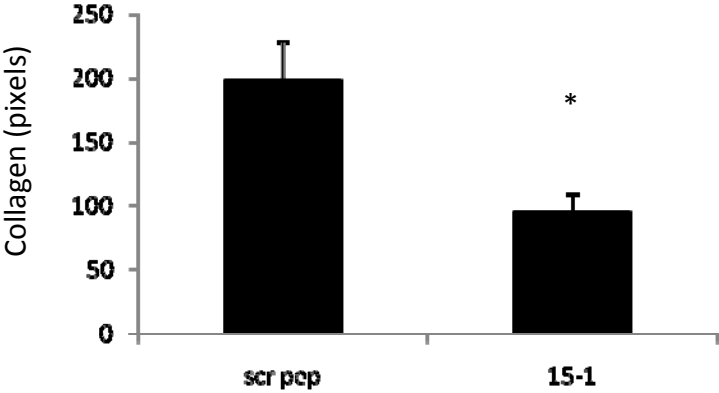

Supplement: mmc5.pdf [file mmc5.pdf]
